# Supplementary material for: Metal–chelator polymers as organophosphate hydrolysis catalystsElectronic supplementary information (ESI) available: heterogeneous catalyst model. See http://www.rsc.org/suppdata/jm/b1/b107998k/
Source: Royal Society of Chemistry journal article supplement (doi:10.1039/b107998k), 2002-01-16
Supplement: b107998k.doc [file b107998k.doc]

**Appendix.**

We are looking at a system that rapidly adsorbs the substrate in solution with the adsorbed substrate molecules then migrating to the active sites on or within the polymer, where hydrolysis takes place. After reaction, the products desorb and return to solution. We cannot say much about the detailed mechanisms by which substrate diffuses towards the catalytic centers in the polymer, but this step appears to be fast based on the observations that the hydrolysis rate constants increase linearly with substrate at low substrate concentrations and that the apparent rates for the polymers are more rapid than solution catalytic rates under the same conditions. These behaviors would be contrary to a diffusion-limited model and is consistent with a reaction-limited situation.

So, for our model, we assume that all catalytic sites are available to substrate binding (thereby using bulk concentration values), which will give us a lower bound on the apparent kinetic rates. We can then look at what happens on these sites using a simple model for the heterogeneous site-catalysis of substrate:

where A, S, A•S, P•S, and P represent the free substrate, vacant (catalytic) binding site, occupied site with substrate, occupied site with product, and product, respectively. In addition, let CA, CS, CA•S, CP•S, and CP, denote the respective concentrations of the same, with Ccat standing for the total catalyst concentration. The rate constants are kA, k-A, kcat, kD, and k-D for the substrate adsorption, substrate desorption, catalytic, product desorption, and product re-sorption rates, respectively.

Assuming the rate limiting step to be the catalytic step, one can show that1

(1)

where

Since the catalytic rate constants are obtained through the initial-rate method, the product concentration is negligible. Also, because we observe little product adsorption, Kp is small and we can take

(2)

Then equation (1) can be cast into the form

(3)

Equation (3) is identical in form to the Michaelis-Menten equation with KA interpreted simply as the dissociation constant for the substrate binding to catalytic site (a consequence of the rate-limiting step assumption).

The assumption for relationship (2) can be verified by noting for, e.g., the MeP system that CP << CA and that while KP is most likely much less than 1, 1/KA is on the order of 10+4.

**Reference**

1) Fogler, H. S., *Elements of Chemical Reaction Engineering*; Prentice Hall, 1998.
